# Supplementary material
Source: publisher figshare collection journal article supplement (https://springernature.figshare.com/articles/dataset/_/24347053)
Supplement: Supplementary file 1 [file 1]

## Sheet: Sheet1
epoch	train loss	train acc	valid loss	valid acc
1	1.03033	0.704025	0.844035	0.482535
2	0.517982	0.748386	39.4479	0.526073
3	0.483254	0.76428	0.868213	0.482535
4	0.495323	0.758264	0.682597	0.605289
5	0.471949	0.768192	0.709539	0.560753
6	0.495282	0.757986	1.46817	0.695609
7	0.724274	0.724281	4.30606	0.517465
8	0.49629	0.759778	0.698008	0.515594
9	0.684427	0.698697	2.62465	0.515594
10	0.480374	0.761939	0.444046	0.790294
11	0.432808	0.797811	0.422052	0.804142
12	0.426171	0.800442	0.484463	0.802146
13	0.456083	0.782986	3.5965	0.517465
14	0.462276	0.779239	0.881812	0.484406
15	0.464408	0.78015	92.9348	0.517465
16	0.468429	0.777019	1.16355	0.517465
17	0.411389	0.809358	0.50285	0.746133
18	0.403938	0.816153	0.422861	0.802146
19	0.403602	0.814894	0.534553	0.735529
20	0.418802	0.806158	10.0556	0.556013
21	0.410447	0.812025	0.610339	0.664421
22	0.398111	0.820189	0.3794	0.834082
23	0.385956	0.828769	202.21	0.515594
24	0.404398	0.816283	0.405309	0.803643
25	0.386851	0.824819	0.482625	0.757236
26	0.401937	0.821072	0.374826	0.830714
27	0.392128	0.824486	0.517739	0.739271
28	0.35031	0.846367	0.353303	0.843937
29	0.345186	0.851064	0.346026	0.848553
30	0.344089	0.852319	0.33987	0.862026
31	0.354715	0.847858	0.576655	0.706088
32	0.344675	0.853189	0.359491	0.84481
33	0.329296	0.860156	0.31605	0.870135
34	0.340325	0.858442	0.652185	0.627744
35	0.333075	0.859458	0.652964	0.753493
36	0.328156	0.862033	0.883886	0.482535
37	0.320407	0.866119	0.341769	0.850549
38	0.323117	0.86595	2.58665	0.576223
39	0.320903	0.868603	0.305221	0.876747
40	0.326154	0.865642	0.310368	0.878244
41	0.312885	0.870897	0.342909	0.856911
42	0.296797	0.879661	0.312182	0.870135
43	0.292689	0.880197	0.487278	0.747755
44	0.299571	0.87878	0.319522	0.870135
45	0.286592	0.882042	0.344867	0.854416
46	0.285494	0.879694	0.302721	0.872879
47	0.344193	0.84915	0.468295	0.770958
48	0.28882	0.877317	0.309444	0.865269
49	0.27291	0.885286	0.335645	0.8624
50	0.2756	0.883864	0.332771	0.869386
51	0.262628	0.887736	0.246446	0.898453
52	0.271574	0.884236	0.665948	0.701098
53	0.274138	0.884536	0.306344	0.86764
54	0.259002	0.889114	5.96011	0.539546
55	0.262779	0.887953	0.28315	0.874501
56	0.262184	0.888689	0.318132	0.86003
57	0.258266	0.890033	0.285475	0.872755
58	0.260663	0.889911	0.287956	0.874875
59	0.252179	0.894031	3.66241	0.636228
60	0.251236	0.894861	0.238359	0.906936
61	0.256082	0.893197	0.300936	0.872879
62	0.330287	0.856989	0.280363	0.872006
63	0.25723	0.888575	1.15857	0.621133
64	0.248655	0.894642	0.394253	0.830963
65	0.246242	0.89695	0.313329	0.871632
66	0.252417	0.891364	0.259722	0.88735
67	0.253588	0.892581	0.230401	0.902944
68	0.241318	0.898197	0.303367	0.867265
69	0.245387	0.894956	0.266734	0.879242
70	0.238042	0.899789	0.256881	0.887101
71	0.243204	0.895914	0.274361	0.884855
72	0.265571	0.887322	0.344779	0.85005
73	0.239946	0.898078	0.248516	0.891342
74	0.237329	0.899867	0.335899	0.856911
75	0.243086	0.897947	0.384699	0.844436
76	0.233792	0.900197	0.440446	0.79229
77	0.236142	0.900947	0.281504	0.886228
78	0.236383	0.8987	0.37417	0.807385
79	0.237965	0.900242	0.464041	0.823478
80	0.2799	0.879608	0.454981	0.771332
81	0.251479	0.894075	0.233176	0.900324
82	0.221574	0.906408	0.258293	0.886727
83	0.211124	0.911197	0.220968	0.906687
84	0.205857	0.913117	0.26347	0.886851
85	0.211652	0.911453	0.248037	0.896457
86	0.208973	0.912869	0.235119	0.904067
87	0.20954	0.912747	0.241618	0.894087
88	0.205642	0.913778	0.203346	0.914296
89	0.206119	0.912906	0.285534	0.874626
90	0.202244	0.914989	0.204572	0.91517
91	0.203697	0.913864	0.226197	0.904566
92	0.206276	0.913405	0.245052	0.897081
93	0.200943	0.914364	0.320961	0.858408
94	0.203041	0.914078	0.191526	0.91991
95	0.199559	0.914439	0.415588	0.867515
96	0.20497	0.914325	0.232832	0.901073
97	0.199993	0.915322	0.216261	0.908807
98	0.196535	0.917989	0.242575	0.903443
99	0.198267	0.916497	0.208155	0.913922
100	0.200087	0.9155	0.21397	0.910803
101	0.203747	0.915028	0.20846	0.912924
102	0.196596	0.918747	0.224132	0.901821
103	0.180641	0.92475	0.193629	0.915793
104	0.181046	0.923742	0.2104	0.910429
105	0.179912	0.925125	0.186635	0.922156
106	0.174184	0.929369	0.193029	0.918039
107	0.178293	0.925536	0.19345	0.91991
108	0.176205	0.926405	0.186669	0.923403
109	0.174728	0.928456	0.175804	0.930389
110	0.180996	0.924328	0.179973	0.92515
111	0.162415	0.935	0.186409	0.920908
112	0.162367	0.934	0.181461	0.925025
113	0.164831	0.931194	0.180064	0.924651
114	0.160886	0.934331	0.173538	0.926771
115	0.158123	0.934114	0.196088	0.91991
116	0.15568	0.934911	0.171506	0.927395
117	0.158863	0.934619	0.189387	0.919286
118	0.154649	0.936119	0.167071	0.933633
119	0.151951	0.937292	0.171387	0.930264
120	0.150314	0.938655	0.173842	0.926771
121	0.148085	0.938994	0.162924	0.934631
122	0.15135	0.9372	0.166126	0.930888
123	0.147375	0.938956	0.15929	0.934756
124	0.143607	0.940575	0.191263	0.924152
125	0.141551	0.941706	0.164102	0.934132
126	0.139123	0.944697	0.17146	0.931886
127	0.140004	0.943083	0.15425	0.939745
128	0.138063	0.944411	0.162727	0.934256
129	0.13586	0.945239	0.168267	0.93226
130	0.133634	0.946494	0.173562	0.930763
131	0.135232	0.9445	0.152978	0.938498
132	0.132919	0.946317	0.160697	0.936252
133	0.136099	0.945747	0.274487	0.891966
134	0.130543	0.946706	0.16407	0.935255
135	0.126585	0.948958	0.187764	0.926896
136	0.124629	0.949661	0.143159	0.94249
137	0.125083	0.950328	0.15767	0.935629
138	0.12245	0.951578	0.14985	0.939496
139	0.125499	0.948658	0.13908	0.945734
140	0.124392	0.951494	0.143322	0.940993
141	0.118565	0.952917	0.138304	0.943363
142	0.115425	0.953617	0.133482	0.944611
143	0.118754	0.952833	0.156213	0.940619
144	0.118056	0.951958	0.146116	0.941866
145	0.119754	0.952372	0.148775	0.941991
146	0.114506	0.955292	0.164491	0.936751
147	0.114718	0.954828	0.151232	0.938997
148	0.112957	0.955083	0.128886	0.947979
149	0.107435	0.957581	0.129965	0.949726
150	0.111141	0.955289	0.223731	0.910803
151	0.109184	0.955828	0.136845	0.943488
152	0.107267	0.957375	0.138849	0.943363
153	0.109892	0.956542	0.134739	0.943613
154	0.106767	0.957292	0.13556	0.945484
155	0.106427	0.957617	0.12309	0.951223
156	0.107308	0.956539	0.297792	0.889721
157	0.106891	0.957369	0.147955	0.939122
158	0.10554	0.958039	0.133977	0.945734
159	0.102336	0.960708	0.16291	0.93513
160	0.101631	0.959453	0.147256	0.938623
161	0.104819	0.957956	0.133151	0.94773
162	0.103703	0.959581	0.130611	0.944486
163	0.0994504	0.962369	0.147188	0.942615
164	0.101177	0.958917	0.263069	0.900324
165	0.0991123	0.961075	0.129448	0.948728
166	0.0986805	0.961333	0.146167	0.941991
167	0.0974134	0.961542	0.121048	0.953593
168	0.0952834	0.962747	0.183399	0.933383
169	0.099755	0.961117	0.186802	0.923528
170	0.0969021	0.962908	0.145688	0.944361
171	0.0954991	0.962414	0.123539	0.953468
172	0.0986149	0.961122	0.182893	0.927395
173	0.0820202	0.970083	0.114665	0.955838
174	0.0797748	0.969625	0.126325	0.953343
175	0.0755494	0.971542	0.121309	0.95247
